# Supplementary material for: Role of N-acyl-homoserine lactone (AHL) based quorum sensing on biofilm formation on packing media in wastewater treatment process
Source: Royal Society of Chemistry journal article supplement (doi:10.1039/c5ra23466b), 2016-01-01
Supplement: c5ra23466b1.pdf [file c5ra23466b1.pdf]

## Supplementary information

**Role of N-acyl-homoserine lactone (AHL) based quorum sensing on biofilm formation on packing media in wastewater treatment process**

Huizhi Hu<sup>1</sup>, Junguo He<sup>1\*</sup>, Jian Liu<sup>1</sup>, Huarong Yu<sup>1</sup>, Jian Tang<sup>1</sup>, Jie Zhang<sup>1</sup>

School of Municipal and Environmental Engineering, Harbin Institute of Technology,  
73 Huanghe Road, Harbin, China.

\*Corresponding author, E-mail: [junguohe@263.net](mailto:junguohe@263.net); Tel: +86-0451-86289099

## Table

**Table S1** Composition of synthetic wastewater

| <b>substance</b>                      | <b>concentration (mg/L)</b> |
|---------------------------------------|-----------------------------|
| CH <sub>3</sub> COONa                 | 400                         |
| NH <sub>4</sub> Cl                    | 107                         |
| MgSO <sub>4</sub> · 7H <sub>2</sub> O | 90                          |
| CaCl <sub>2</sub>                     | 10.55                       |
| K <sub>2</sub> HPO <sub>4</sub>       | 64                          |
| KH <sub>2</sub> PO <sub>4</sub>       | 28                          |
| yeast extract                         | 1                           |
| elements solution                     | 0.5 ml                      |

**Table S2** Composition of trace elements solution

| <b>substance</b>                       | <b>concentration (mg/L)</b> |
|----------------------------------------|-----------------------------|
| FeCl <sub>3</sub> · 6H <sub>2</sub> O  | 1.50                        |
| CuSO <sub>4</sub> · 5H <sub>2</sub> O  | 0.03                        |
| H <sub>3</sub> BO <sub>3</sub>         | 0.15                        |
| KI                                     | 0.18                        |
| MnCl <sub>2</sub> · 4H <sub>2</sub> O  | 0.12                        |
| NaMoO <sub>4</sub> · 2H <sub>2</sub> O | 0.06                        |
| ZnSO <sub>4</sub> · 7H <sub>2</sub> O  | 0.12                        |
| CoCl <sub>2</sub> · 6H <sub>2</sub> O  | 0.15                        |
| EDTA                                   | 10.00                       |

**Table S3** Composition of trace elements solution

| AHL           | Screening<br>time (min) | Retention<br>time (min) | Transitions <sup>1</sup>     | Dwell | Cone | Collision |
|---------------|-------------------------|-------------------------|------------------------------|-------|------|-----------|
| C4-HSL        | /                       | /                       | 172.2 →102.1<br>172.2 →71.1  | 0.015 | 22   | 12        |
| 3OC6-HSL      | /                       | /                       | 214.2 →102.1<br>214.2 → 71.1 | 0.015 | 22   | 12        |
| C6-HSL        | 1.81-2.18               | 2.12                    | 200.2 → 99.1<br>200.2 →102.1 | 0.015 | 20   | 10        |
| 3OC8-HSL      | /                       | /                       | 242.2 →102.1<br>242.2 → 71.3 | 0.015 | 22   | 12        |
| C7-HSL        | /                       | /                       | 214.2 →113.1<br>214.2 →102.1 | 0.015 | 22   | 12        |
| C8-HSL        | 5.25-5.87               | 5.53                    | 228.2 →127.1<br>228.2 →102.1 | 0.015 | 22   | 12        |
| 3OC10-HSL     | /                       | /                       | 270.3 →102.1<br>270.3 →169.1 | 0.015 | 22   | 12        |
| C10-HSL       | /                       | /                       | 256.3 →102.1<br>256.3 →155.1 | 0.015 | 22   | 12        |
| C12-HSL       | /                       | /                       | 283.3 →102.1<br>284.3 →183.2 | 0.015 | 22   | 12        |
| 3-oxo-C12-HSL | 13.39-14.46             | 14.25                   | 298.3 →102.1<br>298.3 →197.2 | 0.015 | 22   | 12        |
| C14-HSL       | 18.85-19.16.            | 19.05                   | 312.4 →102.1<br>312.4 →211.3 | 0.015 | 22   | 12        |

<sup>1</sup>Two most prominent transition ions generated from each precursor ion based on the optimized MS/MS parameters were chosen. The first MRM transition was used for quantification while the second MRM transition was used for identity confirmation.

**Table S4** The top 34 most abundant community members (relative abundance >1%) at genus level

| Rank                    | Blank | Phase I |      |      | Phase II |      |      |       |      |      | Phase III |      |      | add-back   |            |
|-------------------------|-------|---------|------|------|----------|------|------|-------|------|------|-----------|------|------|------------|------------|
|                         |       | 2W      | 4W   | 6W   | 8W       | 10W  | 12W  | 14W   | 16W  | 18W  | 20W       | 22W  | 24W  | 50 nM      | 1000 nM    |
| <i>Brevundimonas</i>    | 0.34  | 0.53    | 0.35 | 0.68 | 0.67     | 0.87 | 1.09 | 1.55  | 1.44 | 1.21 | 0.98      | 1.03 | 1.07 | 1.14       | 0.97       |
| <i>Ilumatobacter</i>    | 0.34  | 0.23    | 0.56 | 0.78 | 1.78     | 2.32 | 2.34 | 3.55  | 3.09 | 2.12 | 1.89      | 1.67 | 1.63 | 1.51       | 1.57       |
| <i>Nitrospira</i>       | 0.45  | 0.32    | 0.43 | 0.45 | 0.67     | 0.78 | 0.85 | 0.94  | 0.84 | 0.90 | 5.78      | 6.35 | 5.71 | 5.82       | 4.93<br>▼  |
| <i>Longilinea</i>       | 2.13  | 2.29    | 2.66 | 2.45 | 1.17     | 1.21 | 1.41 | 2.02  | 1.92 | 1.86 | 1.43      | 1.43 | 2.23 | 3.21<br>▲  | 3.45<br>▲▲ |
| <i>Pseudorhodoferax</i> | 0.93  | 0.42    | 0.58 | 0.87 | 1.06     | 1.46 | 1.56 | 1.87  | 1.68 | 1.55 | 1.82      | 3.42 | 3.16 | 0.79<br>▼▼ | 0.73<br>▼▼ |
| <i>Pseudorhodoferax</i> | 0.56  | 0.84    | 0.84 | 0.89 | 0.98     | 0.46 | 1.66 | 0.84  | 0.89 | 0.98 | 0.73      | 0.62 | 0.74 | 0.99<br>▲  | 0.92<br>▲  |
| <i>Rhodobacter</i>      | 0.29  | 0.38    | 0.32 | 0.54 | 1.13     | 1.87 | 1.43 | 1.97  | 2.07 | 2.10 | 0.92      | 0.48 | 0.84 | 1.01<br>▲  | 1.14<br>▲  |
| <i>Flavobacterium</i>   | 0.39  | 0.43    | 0.58 | 0.43 | 2.40     | 1.94 | 1.72 | 1.67  | 1.53 | 1.34 | 0.94      | 0.89 | 0.93 | 0.73<br>▼  | 0.63<br>▼  |
| <i>Cellulophaga</i>     | 0.69  | 0.78    | 0.95 | 0.84 | 1.44     | 1.01 | 1.10 | 1.32  | 1.12 | 1.08 | 0.69      | 0.72 | 0.54 | 0.62<br>▲  | 0.67<br>▲  |
| <i>Genmatimonas</i>     | 0.43  | 0.54    | 0.53 | 0.65 | 0.58     | 0.68 | 0.83 | 0.47  | 0.69 | 0.78 | 0.87      | 1.23 | 1.31 | 1.42       | 1.23       |
| <i>Dechloromonas</i>    | 4.52  | 5.30    | 5.65 | 5.58 | 7.68     | 8.05 | 9.46 | 10.43 | 8.34 | 7.96 | 7.41      | 6.92 | 7.00 | 8.32<br>▲  | 8.12<br>▲  |
| <i>Azospira</i>         | 0.32  | 0.12    | 0.32 | 0.23 | 0.21     | 1.09 | 0.48 | 0.85  | 0.67 | 1.68 | 2.87      | 3.30 | 2.98 | 3.02       | 3.11       |

|                        |      |      |      |      |      |      |      |      |      |      |      |      |      |      |      |
|------------------------|------|------|------|------|------|------|------|------|------|------|------|------|------|------|------|
| <i>TM7_genera</i>      | 0.19 | 0.18 | 0.21 | 0.23 | 0.65 | 0.87 | 1.24 | 2.49 | 1.56 | 1.04 | 1.17 | 1.22 | 1.49 | 1.78 | 1.95 |
|                        |      |      |      |      |      |      |      |      |      |      |      |      |      | ▲    | ▲    |
| <i>Ferruginibacter</i> | 1.34 | 1.26 | 1.40 | 1.42 | 0.89 | 0.97 | 1.23 | 1.43 | 1.63 | 1.15 | 1.61 | 1.43 | 1.33 | 3.37 | 3.56 |
|                        |      |      |      |      |      |      |      |      |      |      |      |      |      | ▲▲   | ▲▲   |
| <i>Thermomonas</i>     | 0.58 | 0.43 | 0.54 | 0.43 | 1.34 | 1.42 | 1.48 | 2.52 | 1.43 | 1.10 | 0.54 | 0.67 | 0.58 | 0.47 | 0.42 |
|                        |      |      |      |      |      |      |      |      |      |      |      |      |      | ▼    | ▼    |
| <i>OD1_genera</i>      | 1.03 | 1.16 | 1.23 | 1.11 | 0.94 | 0.84 | 0.89 | 0.74 | 0.59 | 0.83 | 0.58 | 0.38 | 0.43 | 0.48 | 0.67 |
|                        |      |      |      |      |      |      |      |      |      |      |      |      |      | ▲    | ▲    |
| <i>Simplicispira</i>   | 0.38 | 0.43 | 0.43 | 0.73 | 1.14 | 0.98 | 2.44 | 0.78 | 1.43 | 0.84 | 0.43 | 0.66 | 0.75 | 0.42 | 0.34 |
|                        |      |      |      |      |      |      |      |      |      |      |      |      |      | ▼    | ▼▼   |
| <i>Caenimonas</i>      | 0.59 | 0.54 | 0.67 | 0.73 | 1.34 | 1.05 | 3.32 | 1.29 | 1.60 | 1.62 | 2.84 | 1.08 | 1.06 | 1.23 | 1.34 |
|                        |      |      |      |      |      |      |      |      |      |      |      |      |      | ▲    | ▲    |
| <i>Sphingopyxis</i>    | 0.55 | 0.45 | 0.78 | 0.89 | 1.54 | 1.43 | 1.38 | 1.82 | 1.62 | 1.32 | 0.93 | 0.84 | 0.87 | 1.11 | 0.93 |
|                        |      |      |      |      |      |      |      |      |      |      |      |      |      | ▲    |      |
| <i>Hydrogenophaga</i>  | 3.12 | 3.34 | 4.77 | 4.60 | 1.25 | 1.56 | 2.68 | 3.17 | 2.17 | 1.36 | 0.92 | 0.98 | 0.94 | 0.99 | 0.67 |
|                        |      |      |      |      |      |      |      |      |      |      |      |      |      |      | ▼    |
| <i>Arcobacter</i>      | 1.87 | 1.29 | 1.23 | 1.87 | 0.38 | 1.48 | 0.64 | 1.02 | 0.48 | 0.53 | 0.36 | 0.48 | 0.43 | 0.43 | 0.58 |
|                        |      |      |      |      |      |      |      |      |      |      |      |      |      |      | ▲    |
| <i>Phycisphaera</i>    | 0.49 | 0.84 | 0.47 | 0.63 | 0.43 | 0.74 | 0.76 | 0.89 | 0.94 | 0.95 | 1.43 | 1.23 | 1.18 | 1.22 | 1.43 |
|                        |      |      |      |      |      |      |      |      |      |      |      |      |      |      | ▲    |
| <i>Terrimonas</i>      | 0.47 | 0.54 | 0.74 | 0.87 | 0.85 | 1.12 | 1.67 | 3.91 | 4.20 | 1.23 | 2.20 | 2.37 | 2.34 | 0.75 | 0.94 |
|                        |      |      |      |      |      |      |      |      |      |      |      |      |      |      |      |
| <i>Leptothrix</i>      | 1.91 | 1.84 | 1.88 | 1.09 | 0.84 | 0.73 | 0.84 | 0.92 | 0.83 | 0.99 | 4.18 | 3.96 | 3.33 | 1.02 | 1.04 |
|                        |      |      |      |      |      |      |      |      |      |      |      |      |      |      |      |
| <i>Bdellovibrio</i>    | 1.29 | 1.27 | 1.19 | 1.11 | 0.75 | 0.78 | 0.84 | 0.63 | 0.62 | 0.68 | 0.59 | 0.63 | 0.52 | 0.42 | 0.57 |
|                        |      |      |      |      |      |      |      |      |      |      |      |      |      | ▼    |      |
| <i>Perlucidibaca</i>   | 1.20 | 1.16 | 1.01 | 1.88 | 0.93 | 0.83 | 0.94 | 0.99 | 0.81 | 0.98 | 0.84 | 0.73 | 0.69 | 1.45 | 1.64 |
|                        |      |      |      |      |      |      |      |      |      |      |      |      |      | ▲▲   | ▲▲   |
| <i>Sulfuritalea</i>    | 2.15 | 1.78 | 1.81 | 2.30 | 2.20 | 1.90 | 1.59 | 1.03 | 0.84 | 2.65 | 5.27 | 5.57 | 6.97 | 3.29 | 4.39 |
|                        |      |      |      |      |      |      |      |      |      |      |      |      |      |      |      |

|                             |       |       |       |       |       |       |       |      |       |       |      |      |      |      |      |
|-----------------------------|-------|-------|-------|-------|-------|-------|-------|------|-------|-------|------|------|------|------|------|
| <i>Gp4</i>                  | 0.93  | 0.95  | 0.74  | 0.84  | 1.12  | 0.72  | 0.89  | 1.04 | 2.30  | 1.54  | 0.89 | 0.56 | 0.53 | 0.73 | 0.85 |
|                             |       |       |       |       |       |       |       |      |       |       |      |      |      | ▲    | ▲▲   |
| <i>Haliscomenobacter</i>    | 12.59 | 12.65 | 11.89 | 11.97 | 12.67 | 13.50 | 10.49 | 9.30 | 10.99 | 14.24 | 7.49 | 6.15 | 4.99 | 5.02 | 5.34 |
| <i>Sediminibacterium</i>    | 1.53  | 1.52  | 1.53  | 1.45  | 2.20  | 1.10  | 1.68  | 1.12 | 1.87  | 1.54  | 0.95 | 0.69 | 0.79 | 0.83 | 0.97 |
|                             |       |       |       |       |       |       |       |      |       |       |      |      |      |      | ▲    |
| <i>Aeromonas</i>            | 0.72  | 0.68  | 0.92  | 0.83  | 1.25  | 1.56  | 1.78  | 2.45 | 2.23  | 2.12  | 1.54 | 1.45 | 1.40 | 1.12 | 1.45 |
|                             |       |       |       |       |       |       |       |      |       |       |      |      |      | ▼    |      |
| <i>Enterobacter sp.</i>     | 0.82  | 0.93  | 0.69  | 0.93  | 1.03  | 1.10  | 1.21  | 1.34 | 1.26  | 1.17  | 0.79 | 0.76 | 0.85 | 0.92 | 1.32 |
|                             |       |       |       |       |       |       |       |      |       |       |      |      |      |      | ▲▲   |
| <i>Nitrosomonas</i>         | 0.17  | 0.52  | 0.66  | 0.79  | 1.12  | 1.35  | 1.76  | 1.87 | 1.42  | 1.32  | 1.16 | 1.14 | 1.05 | 2.29 | 3.45 |
|                             |       |       |       |       |       |       |       |      |       |       |      |      |      | ▲▲   | ▲▲   |
| <i>Stenotrophomonas sp.</i> | 1.32  | 1.36  | 1.97  | 2.78  | 2.92  | 3.58  | 4.12  | 5.31 | 4.25  | 3.70  | 1.43 | 1.40 | 1.24 | 3.15 | 4.12 |
|                             |       |       |       |       |       |       |       |      |       |       |      |      |      | ▲▲   | ▲▲   |

▼ : decrease rate > 10%; ▼▼ : decrease rate > 50%;

▲ : increase rate > 10%; ▲▲ : increase rate > 50%.

## Figure

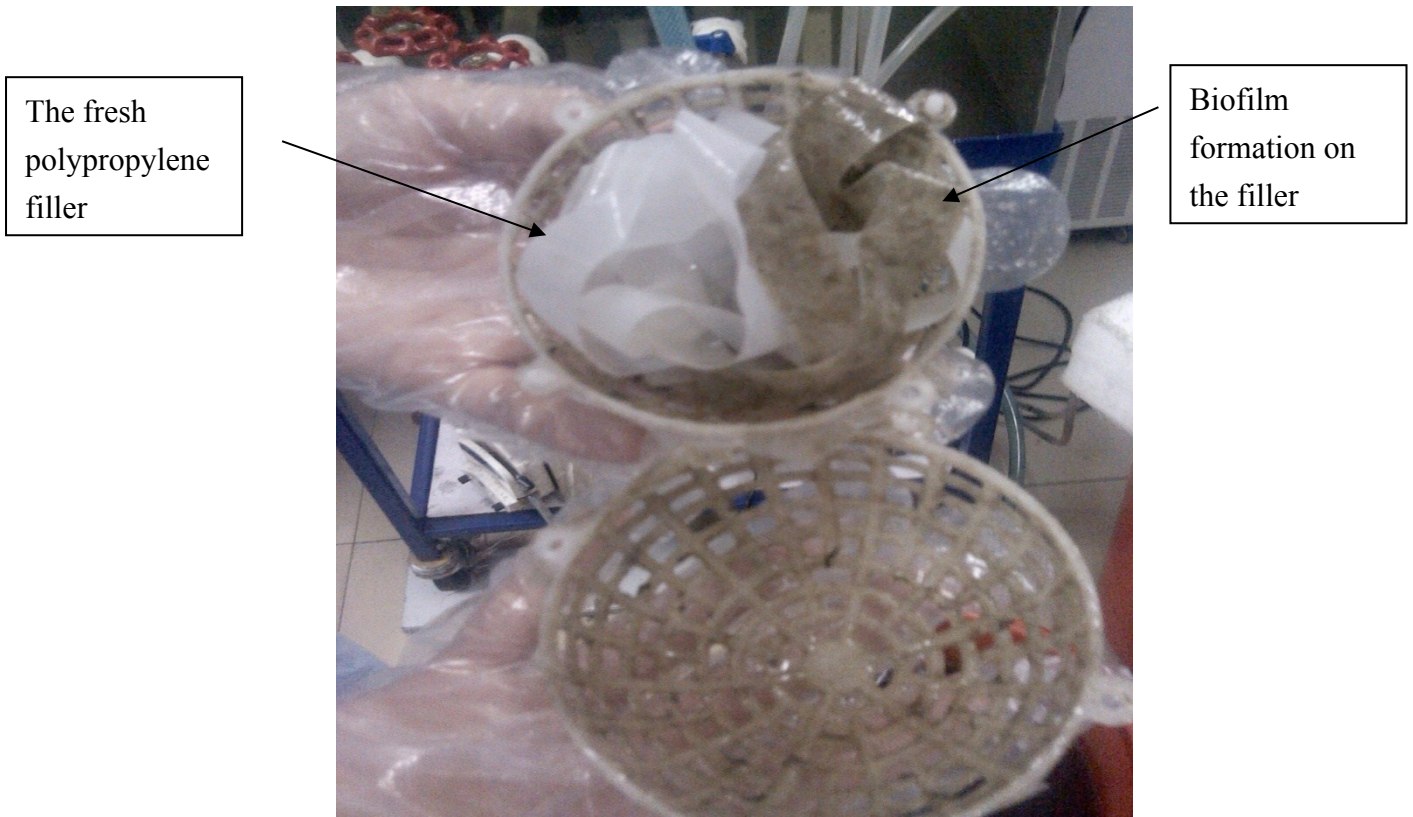

**Figure S1** - Picture of polypropylene media used in the process
